# Supplementary material for: Loss of SATB2 Occurs More Frequently Than CDX2 Loss in Colorectal Carcinoma and Identifies Particularly Aggressive Cancers in High-Risk Subgroups
Source: MDPI journal article supplement (doi:10.3390/cancers13246177), 2021-12-07
Supplement: s1 [file s1]

# Loss of SATB2 Occurs More Frequently Than CDX2 Loss in Colorectal Carcinoma and Identifies Particularly Aggressive Cancers in High-Risk Subgroups

Maxime Schmitt, Miguel Silva, Björn Konukiewitz, Corinna Lang, Katja Steiger, Kathrin Halfter, Jutta Engel, Paul Jank, Nicole Pfarr, Dirk Wilhelm, Sebastian Foersch, Carsten Denkert, Markus Tschurtschenthaler, Wilko Weichert and Moritz Jesinghaus

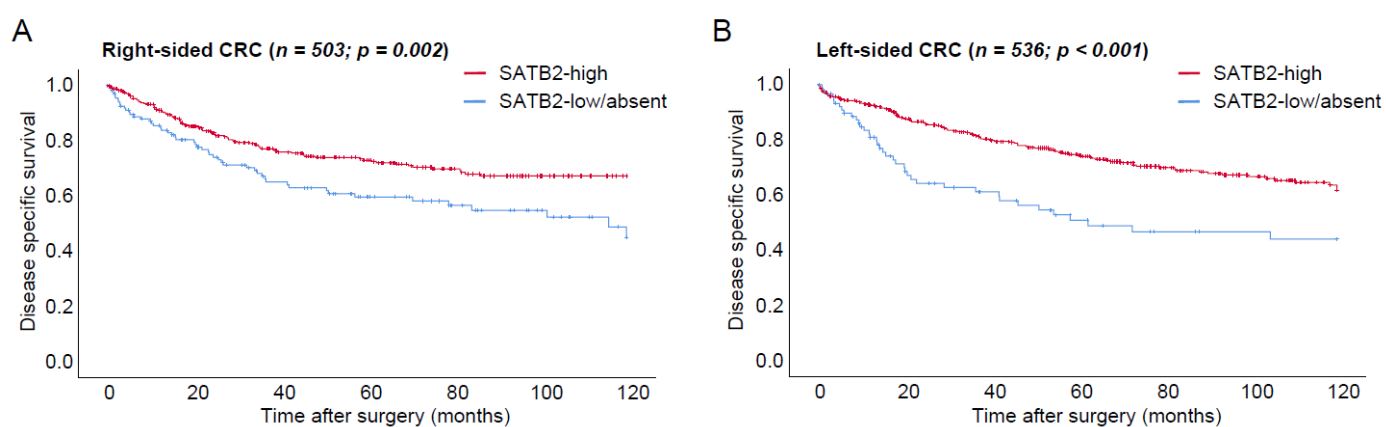

**Figure S1.** Prognostic relevance of SATB2 expression for disease-specific survival in right-sided (A, coecum until splenic flexure) and left-sided (descending colon until rectum) CRCs.

**Table S1.** Correlation between SATB2 expression groups with SATB2 staining pattern (A) and SATB2 staining intensity (B).

| Variables    | Variables                |        |              |         | Total  | p-Value |         |
|--------------|--------------------------|--------|--------------|---------|--------|---------|---------|
| A            | SATB2 staining pattern   |        |              |         |        |         |         |
|              |                          | absent | heterogenous | diffuse |        |         |         |
| SATB2 groups | low/absent               | 60     | 155          | 16      | 231    | p<0.001 |         |
|              | high                     | 0      | 185          | 623     | 808    |         |         |
| total        |                          | 60     | 340          | 639     | 1039   |         |         |
| B            | SATB2 staining intensity |        |              |         |        |         |         |
|              |                          | absent | weak         | medium  | strong |         |         |
| SATB2 groups | low/absent               | 60     | 118          | 48      | 5      | 231     | p<0.001 |
|              | high                     | 0      | 27           | 164     | 617    | 808     |         |
| total        |                          | 60     | 145          | 212     | 622    | 1039    |         |

**Table S2.** Distribution of SATB2 expression groups with clinicopathological and morphological parameters in the overall cohort.

| Variables           |                               | Overall     | SATB2 Low/Absent | SATB2 High   | p-Value |
|---------------------|-------------------------------|-------------|------------------|--------------|---------|
|                     |                               | 1039 (100%) | 231 (22.2%)      | 808 (77.8%)  |         |
| Age                 |                               |             |                  |              | 0.297   |
|                     | below median                  | 504 (48.5%) | 105 (45.5%)      | 399 (49.4%)  |         |
|                     | above median                  | 535 (51.5%) | 126 (54.5%)      | 409 (50.6%)  |         |
| Gender              |                               |             |                  |              | 0.227   |
|                     | female                        | 440 (42.3%) | 106 (45.9%)      | 334 (41.3%)  |         |
|                     | male                          | 599 (57.7%) | 125 (54.1%)      | 474 (58.7%)  |         |
| pT                  |                               |             |                  |              | <0.001  |
|                     | 1                             | 79 (7.6%)   | 6 (2.6%)         | 73 (9%)      |         |
|                     | 2                             | 187 (18%)   | 31 (13.4%)       | 156 (19.3%)  |         |
|                     | 3                             | 578 (55.6%) | 127 (55%)        | 451 (55.8%)  |         |
|                     | 4                             | 195 (18.8%) | 67 (29%)         | 128 (15.8%)  |         |
| pN                  |                               |             |                  |              | <0.001  |
|                     | 0                             | 580 (55.8%) | 97 (42%)         | 483 (59.8%)  |         |
|                     | 1                             | 292 (28.1%) | 69 (29.9%)       | 223 (27.6%)  |         |
|                     | 2                             | 167 (16.1%) | 65 (28.1%)       | 102 (12.6%)  |         |
| pM                  |                               |             |                  |              | <0.001  |
|                     | 0                             | 887 (85.4%) | 174 (75.3%)      | 713 (88.2%)  |         |
|                     | 1                             | 152 (14.6%) | 57 (24.7%)       | 95 (11.8%)   |         |
| UICC Stage          |                               |             |                  |              | <0.001  |
|                     | 1                             | 213 (20.5%) | 27 (11.7%)       | 186 (23%)    |         |
|                     | 2                             | 350 (33.7%) | 67 (29%)         | 283 (35%)    |         |
|                     | 3                             | 318 (30.6%) | 78 (33.8%)       | 240 (29.7%)  |         |
|                     | 4                             | 158 (15.2%) | 59 (25.5%)       | 99 (12.3%)   |         |
| Tumour type (WHO)   |                               |             |                  |              | <0.001  |
|                     | Adenocarcinoma NOS            | 650 (62.6%) | 106 (45.9%)      | 544 (67.3%)  |         |
|                     | Mucinous adenocarcinoma       | 88 (8.5%)   | 36 (15.6%)       | 52 (6.4%)    |         |
|                     | Signet-ring cell carcinoma    | 9 (0.9%)    | 6 (2.6%)         | 3 (0.4%)     |         |
|                     | Medullary adenocarcinoma      | 32 (3.1%)   | 13 (5.6%)        | 19 (2.4%)    |         |
|                     | Micropapillary adenocarcinoma | 129 (12.4%) | 41 (17.7%)       | 88 (10.9%)   |         |
|                     | Serrated adenocarcinoma       | 91 (8.7%)   | 19 (8.2%)        | 72 (8.9%)    |         |
|                     | Adenoma-like adenocarcinoma   | 33 (3.2%)   | 5 (2.2%)         | 28 (3.5%)    |         |
| WHO grade           | MANEC/NEC                     | 7 (0.7%)    | 5 (2.2%)         | 2 (0.2%)     | <0.001  |
|                     | low-grade                     | 708 (68.1%) | 125 (54.1%)      | 583 (72.2%)  |         |
|                     | high-grade                    | 331 (31.9%) | 106 (45.9%)      | 225 (27.8%)  |         |
| Tumour budding      |                               |             |                  |              | <0.001  |
|                     | Bd1                           | 560 (53.9%) | 96 (41.6%)       | 464 (57.4%)  |         |
|                     | Bd2                           | 270 (26%)   | 60 (26%)         | 210 (26%)    |         |
|                     | Bd3                           | 209 (20.1%) | 75 (32.5%)       | 134 (16.6%)  |         |
| Resection margin    |                               |             |                  |              | <0.001  |
|                     | R0                            | 960 (92.4%) | 199 (86.1%)      | 761 (94.2 %) |         |
|                     | R1                            | 49 (4.7%)   | 22 (9.5%)        | 27 (3.3%)    |         |
|                     | R2                            | 30 (2.9%)   | 10 (4.3%)        | 20 (2.5%)    |         |
| Lymphatic invasion  |                               |             |                  |              | 0.001   |
|                     | not present                   | 508 (48.9%) | 74 (32%)         | 434 (53.7%)  |         |
|                     | present                       | 531 (51.1%) | 157 (68%)        | 374 (46.3%)  |         |
| Venous invasion     |                               |             |                  |              | <0.001  |
|                     | not present                   | 904 (87%)   | 179 (77.5%)      | 725 (89.7%)  |         |
|                     | present                       | 135 (13%)   | 52 (22.5%)       | 83 (10.3%)   |         |
| Perineural invasion |                               |             |                  |              | 0.001   |
|                     | not present                   | 956 (92%)   | 200 (86.6%)      | 756 (93.6%)  |         |

|                       |                              |             |             |             |        |
|-----------------------|------------------------------|-------------|-------------|-------------|--------|
|                       | present                      | 83 (8%)     | 31 (13.4%)  | 52 (6.4%)   |        |
| Microsatellite status |                              |             |             |             | 0.01   |
|                       | Microsatellite stable        | 877 (84.4%) | 182 (78.8%) | 695 (86%)   |        |
|                       | Microsatellite instable      | 162 (15.6%) | 49 (21.2%)  | 113 (14%)   |        |
| Tumour localization   |                              |             |             |             | <0.001 |
|                       | Right colon (Coec/Asc/Trans) | 503 (48.4%) | 138 (59.7%) | 365 (45.2%) |        |
|                       | Left colon (Desc/Sigm/Rect)  | 536 (51.6%) | 93 (40.3%)  | 443 (54.8%) |        |

**Table S3.** Impact of SATB2 expression on overall, disease-specific and disease-free survival in tumour budding (Bd1, Bd2, Bd3), WHO grade (low, high), microsatellite (MSS, MSI-H) and CDX2 expression subcohorts (low/absent, high).

| Variables                                 | SATB2 Groups     | Overall <i>n</i><br>(%) | Mean Overall<br>Survival<br>(SE) [Months] | <i>p</i> -Value | Mean Disease<br>Specific Survival<br>(SE) [Months] | <i>p</i> -Value | Mean Disease Free<br>Survival<br>(SE) [Months] | <i>p</i> -Value |
|-------------------------------------------|------------------|-------------------------|-------------------------------------------|-----------------|----------------------------------------------------|-----------------|------------------------------------------------|-----------------|
| WHO grade: low-<br>grade subcohort        |                  |                         |                                           | 0.110           |                                                    | 0.027           |                                                | 0.001           |
|                                           | SATB2 low/absent | 125 (17.6%)             | 81.1 (4.7)                                |                 | 88.1 (4.7)                                         |                 | 77.1 (5.1)                                     |                 |
|                                           | SATB2 high       | 583 (82.4%)             | 87.1 (2.0)                                |                 | 96.7 (1.9)                                         |                 | 92.1 (2.0)                                     |                 |
| WHO grade: high-<br>grade subcohort       |                  |                         |                                           | 0.013           |                                                    | 0.002           |                                                | 0.016           |
|                                           | SATB2 low/absent | 106 (32%)               | 54.8 (5.0)                                |                 | 59.5 (5.3)                                         |                 | 57.4 (5.6)                                     |                 |
|                                           | SATB2 high       | 225 (68%)               | 70.3 (3.4)                                |                 | 78.8 (3.5)                                         |                 | 72 (3.6)                                       |                 |
| Tumour budding:<br>Bd1 subcohort          |                  |                         |                                           | 0.034           |                                                    | 0,05            |                                                | 0.026           |
|                                           | SATB2 low/absent | 96 (17.1%)              | 90.3 (4.8)                                |                 | 104.4 (3.9)                                        |                 | 99.7 (4.6)                                     |                 |
|                                           | SATB2 high       | 464 (82.9%)             | 99.3 (1.9)                                |                 | 110.2 (1.4)                                        |                 | 108.3 (1.6)                                    |                 |
| Tumour budding:<br>Bd2 subcohort          |                  |                         |                                           | 0.147           |                                                    | 0.564           |                                                | 0.258           |
|                                           | SATB2 low/absent | 60 (22.2%)              | 78.3 (6.7)                                |                 | 80.7 (6.7)                                         |                 | 74.7 (7.2)                                     |                 |
|                                           | SATB2 high       | 210 (77.8%)             | 68.4 (3.5)                                |                 | 76.7 (3.6)                                         |                 | 64.6 (3.8)                                     |                 |
| Tumour budding:<br>Bd3 subcohort          |                  |                         |                                           | 0.005           |                                                    | 0.002           |                                                | <0.001          |
|                                           | SATB2 low/absent | 75 (35.9%)              | 29.4 (4.4)                                |                 | 29 (4.3)                                           |                 | 19.4 (3.6)                                     |                 |
|                                           | SATB2 high       | 134 (64.1%)             | 46.7 (4.0)                                |                 | 51.1 (4.4)                                         |                 | 44.3 (4.4)                                     |                 |
| Microsatellite status:<br>MSS subcohort   |                  |                         |                                           | <0.001          |                                                    | <0.001          |                                                | <0.001          |
|                                           | SATB2 low/absent | 182 (20.7%)             | 65.4 (4.0)                                |                 | 70 (4.1)                                           |                 | 62.8 (4.3)                                     |                 |
|                                           | SATB2 high       | 695 (79.3%)             | 80.7 (1.9)                                |                 | 89.4 (1.8)                                         |                 | 84.1 (2.0)                                     |                 |
| Microsatellite status:<br>MSI-H subcohort |                  |                         |                                           | 0.072           |                                                    | 0.023           |                                                | 0.163           |
|                                           | SATB2 low/absent | 49 (30.2%)              | 78.8 (7.3)                                |                 | 90.6 (7.1)                                         |                 | 89 (7.9)                                       |                 |
|                                           | SATB2 high       | 113 (69.8%)             | 92.3 (4.4)                                |                 | 105.8 (3.6)                                        |                 | 101 (4.19)                                     |                 |
| CDX2 low-absent<br>subcohort              |                  |                         |                                           | 0.026           |                                                    | 0.021           |                                                | 0.0069          |
|                                           | SATB2 low/absent | 64 (60.4%)              | 58.4 (7.2)                                |                 | 64.5 (7.6)                                         |                 | 60.1 (7.6)                                     |                 |
|                                           | SATB2 high       | 42 (39.6%)              | 82.1 (8.2)                                |                 | 91.2 (7.8)                                         |                 | 84.6 (8.5)                                     |                 |
| CDX2 high<br>subcohort                    |                  |                         |                                           | 0.013           |                                                    | <0.001          |                                                | <0.001          |
|                                           | SATB2 low/absent | 167 (17.9%)             | 71.8 (4.0)                                |                 | 77.3 (4.1)                                         |                 | 70.7 (4.5)                                     |                 |
|                                           | SATB2 high       | 766 (82.1%)             | 82.2 (1.8)                                |                 | 91.6 (1.7)                                         |                 | 86.5 (1.9)                                     |                 |

**Table S4.** Impact of SATB2 expression on overall, disease-specific and disease-free survival in the different UICC stage groups.

| Variables      | SATB2 Groups     | Overall <i>n</i> (%) | Mean Overall Survival (SE) [Months] | <i>p</i> -Value | Mean Disease Specific Survival (SE) [Months] | <i>p</i> -Value | Mean Disease Free Survival (SE) [Months] | <i>p</i> -Value |
|----------------|------------------|----------------------|-------------------------------------|-----------------|----------------------------------------------|-----------------|------------------------------------------|-----------------|
| UICC stage I   |                  |                      |                                     | 0.397           |                                              | 0.593           |                                          | 0.608           |
|                | SATB2 low/absent | 27 (12.7%)           | 93.1 (8.2)                          |                 | 111.1 (5.3)                                  |                 | 114.6 (4.6)                              |                 |
|                | SATB2 high       | 186 (87.3%)          | 97.1 (3.1)                          |                 | 111 (2.3)                                    |                 | 107 (2.6)                                |                 |
| UICC stage II  |                  |                      |                                     | 0.977           |                                              | 0.664           |                                          | 0.342           |
|                | SATB2 low/absent | 67 (19.1%)           | 86.2 (6.4)                          |                 | 95.5 (6.2)                                   |                 | 89.5 (6.7)                               |                 |
|                | SATB2 high       | 283 (80.9%)          | 86 (2.6)                            |                 | 97.3 (2.7)                                   |                 | 96.9 (2.8)                               |                 |
| UICC stage III |                  |                      |                                     | 0.025           |                                              | 0.012           |                                          | 0.004           |
|                | SATB2 low/absent | 78 (24.5%)           | 70.3 (6.1)                          |                 | 74.5 (6.2)                                   |                 | 62.1 (6.5)                               |                 |
|                | SATB2 high       | 240 (75.5%)          | 84.4 (3.1)                          |                 | 91 (3.0)                                     |                 | 81.2 (3.4)                               |                 |
| UICC stage IV  |                  |                      |                                     | 0.593           |                                              | 0.397           |                                          | 0.564           |
|                | SATB2 low/absent | 59 (37.3%)           | 37.4 (5.6)                          |                 | 38.3 (5.7)                                   |                 | 33.4 (6.2)                               |                 |
|                | SATB2 high       | 99 (62.7%)           | 40.3 (4.2)                          |                 | 43.9 (4.6)                                   |                 | 33.2 (3.5)                               |                 |

**Table S5.** Multivariate overall survival analysis in the overall cohort under inclusion of SATB2 expression, age, gender, CRC subtype, tumour budding, WHO grade and microsatellite status.

| Variables                     | HR (DSS) | Lower CI (95%) | Upper CI (95%) | <i>p</i> -Value |
|-------------------------------|----------|----------------|----------------|-----------------|
| SATB2 subgroups               |          |                |                | 0.1             |
| SATB2 high                    | 1.00     |                |                |                 |
| SATB2 Low/absent              | 1.25     | 0.95           | 1.63           |                 |
| WHO Subtype                   |          |                |                | 0.05            |
| Adenocarcinoma NOS            | 1.00     |                |                |                 |
| Mucinous adenocarcinoma       | 0.99     | 0.63           | 1.56           |                 |
| Signet-ring cell carcinoma    | 0.88     | 0.31           | 2.53           |                 |
| Medullary carcinoma           | 0.14     | 0.02           | 1.01           |                 |
| Micropapillary adenocarcinoma | 0.88     | 0.65           | 1.19           |                 |
| Serrated adenocarcinoma       | 1.11     | 0.72           | 1.71           |                 |
| Adenoma-like adenocarcinoma   | 0.69     | 0.17           | 2.88           |                 |
| MANEC/NEC                     | 2.16     | 0.84           | 5.53           |                 |
| Tumour budding                |          |                |                | <0.001          |
| Bd1                           | 1.00     |                |                |                 |
| Bd2                           | 3.14     | 2.23           | 4.42           |                 |
| Bd3                           | 6.73     | 4.65           | 9.74           |                 |
| WHO-grade                     |          |                |                | 0.016           |
| Low grade                     | 1.00     |                |                |                 |
| High grade                    | 1.36     | 1.06           | 1.74           |                 |
| UICC Stage                    |          |                |                | <0.001          |
| I                             | 1.00     |                |                |                 |
| II                            | 1.65     | 0.99           | 2.76           |                 |
| III                           | 1.73     | 1.04           | 2.89           |                 |
| IV                            | 3.89     | 2.26           | 6.70           |                 |
| Gender                        |          |                |                | 0.293           |
| female                        | 1.00     |                |                |                 |
| male                          | 1.14     | 0.89           | 1.45           |                 |
| Resection status              |          |                |                | 0.001           |
| R0                            | 1.00     |                |                |                 |
| R1/2                          | 1.43     | 1.17           | 1.77           |                 |

|                       |                         |      |      |       |
|-----------------------|-------------------------|------|------|-------|
| Tumour localization   |                         |      |      | 0.426 |
|                       | Right colon             | 1.00 |      |       |
|                       | Left colon              | 1.10 | 0.86 | 1.41  |
| Age group             |                         |      |      | 0.007 |
|                       | Below median            | 1.00 |      |       |
|                       | Median and above        | 1.39 | 1.10 | 1.78  |
| Microsatellite status |                         |      |      | 0.9   |
|                       | Microsatellite instable | 1.00 |      |       |
|                       | Microsatellite stable   | 1.00 | 0.63 | 1.59  |

**Table S6.** Multivariate overall survival analysis in the overall cohort under exclusion of CRC subtype, tumour budding and WHO grade.

| Variables             | HR (DSS)                | Lower CI (95%) | Upper CI (95%) | <i>p</i> -Value |
|-----------------------|-------------------------|----------------|----------------|-----------------|
| SATB2 subgroups       |                         |                |                | 0.029           |
|                       | SATB2 high              | 1.00           |                |                 |
|                       | SATB2 Low/absent        | 1.32           | 1.03           | 1.71            |
| UICC Stage            |                         |                |                | <0.001          |
|                       | I                       | 1.00           |                |                 |
|                       | II                      | 2.58           | 1.57           | 4.25            |
|                       | III                     | 3.64           | 2.24           | 5.91            |
|                       | IV                      | 10.36          | 6.25           | 17.17           |
| Gender                |                         |                |                | 0.85            |
|                       | female                  | 1.00           |                |                 |
|                       | male                    | 1.14           | 0.93           | 1.50            |
| Resection status      |                         |                |                | <0.001          |
|                       | R0                      | 1.00           |                |                 |
|                       | R1/2                    | 1.61           | 1.31           | 1.98            |
| Tumour localization   |                         |                |                | 0.426           |
|                       | Right colon             | 1.00           |                |                 |
|                       | Left colon              | 1.10           | 0.86           | 1.41            |
| Age group             |                         |                |                | <0.001          |
|                       | Below median            | 1.00           |                |                 |
|                       | Median and above        | 1.54           | 1.22           | 1.95            |
| Microsatellite status |                         |                |                | 0.029           |
|                       | Microsatellite stable   | 1.00           |                |                 |
|                       | Microsatellite instable | 0.6            | 0.40           | 0.95            |
